# Supplementary material for: Structural characterization of HPM-7, a more ordered than expected germanosilicate zeolite
Source: Royal Society of Chemistry journal article supplement (doi:10.1039/d0dt00818d), 2020-01-01
Supplement: d0dt00818d1.pdf [file d0dt00818d1.pdf]

Electronic Supplementary Information

## Structural Characterization of HPM-7, a More Ordered Than Expected Germanosilicate Zeolite

Peng Lu, Yaping Zhang, Alvaro Mayoral, Luis Gómez-Hortigüela and Miguel Cambor\*

### Index:

**Fig. S1** Rietveld plot of as-made HPM-7 ( $\lambda=0.56383$  Å). Purple points: experimental, green line: calculated, blue line: difference, yellow markers: allowed reflections. The refinement is considered unsuccessful (see disagreements marked by red arrows).

**Fig. S2** Stacking faults of POS-A and POS-B along a unique direction ([1-10] or [110]) has little impact on the corresponding XRD patterns, as shown here with all patterns superimposed. The inset shows the portion of the pattern where the largest changes are observed, with the experimental pattern for comparison.

**Fig. S3** Simulated XRD patterns for POS-C intergrown with itself with or without a 90° rotation. The bottom and top traces correspond to 99% pure structures with a given orientation (hence both are related by a 90° shift) and are compared to the experimental HPM-7. The intermediate traces correspond to 10% increments of a given orientation. There is hardly any change in the XRD along the series and very subtle differences with POS (arrows).

**Fig. S4** Different cutting planes from 3D-EDT data. Reflection rule agrees with the P42/mnm (SG: No.136): 0kl:  $k+l=2n$ ; 00l:  $l=2n$ ; 0k0:  $k=2n$ .

**Table S1** 29 independent 3D-EDT data sets.

**Fig. S5** Cs-corrected STEM ADF analysis of HPM-7 along the [001] zone axis. a) Low-magnification image. b) Electron diffraction pattern that clearly displays the crystal extinctions (yellow arrows). c) and d) High-resolution images obtained from the edge of the crystal.

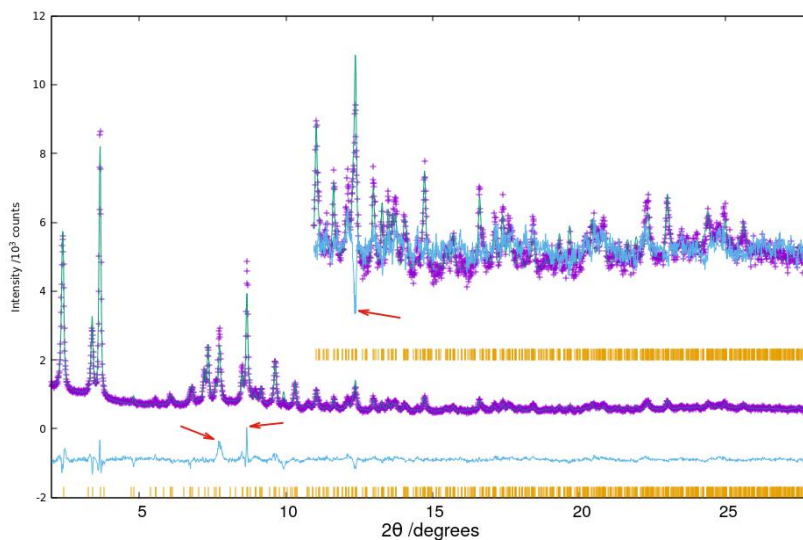

**Fig. S1** Rietveld plot of as-made HPM-7 ( $\lambda=0.56383 \text{ \AA}$ ). Purple points: experimental, green line: calculated, blue line: difference, yellow markers: allowed reflections. The refinement is considered unsuccessful (see disagreements marked by red arrows).

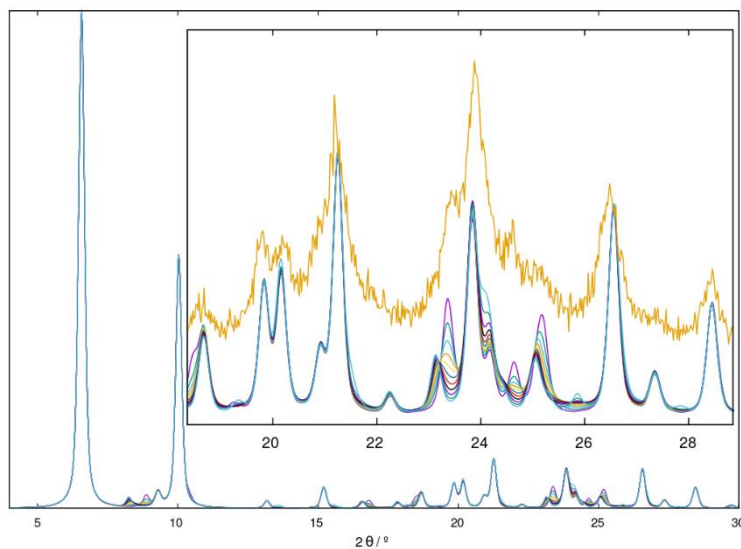

**Fig. S2** Stacking faults of POS-A and POS-B along a unique direction ( $[1-10]$  or  $[110]$ ) has little impact on the corresponding XRD patterns, as shown here with all patterns superimposed. The inset shows the portion of the pattern where the largest changes are observed, with the experimental pattern for comparison.

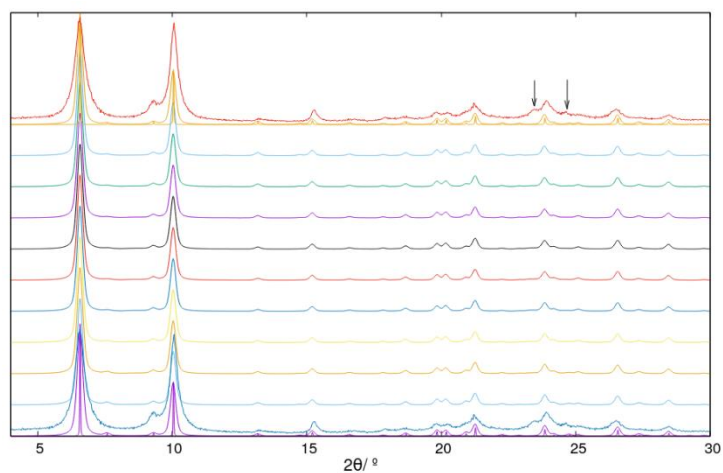

**Fig. S3** Simulated XRD patterns for POS-C intergrown with itself with or without a  $90^\circ$  rotation. The bottom and top traces correspond to 99% pure structures with a given orientation (hence both are related by a  $90^\circ$  shift) and are compared to the experimental HPM-7. The intermediate traces correspond to 10% increments of a given orientation. There is hardly any change in the XRD along the series and very subtle differences with POS (arrows).

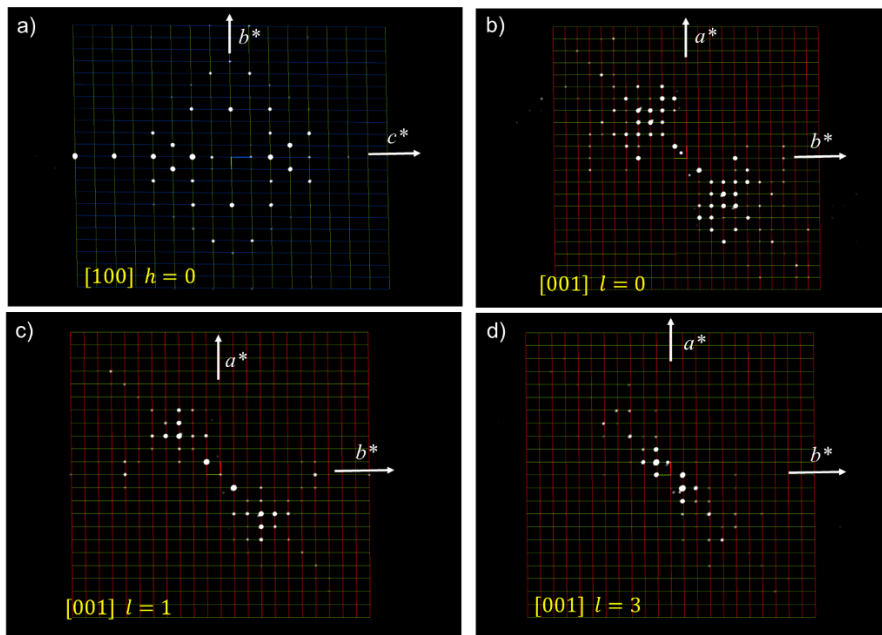

**Fig. S4** Different cutting planes from 3D-EDT data. Reflection rule agrees with the P42/mmm (SG: No.136):  $0kl: k+l=2n$ ;  $00l: l=2n$ ;  $0k0: k=2n$ .

**Table S1 29 independent 3D-EDT data sets**

| No | Resolution | $a(\text{Å})$ | $b(\text{Å})$ | $c(\text{Å})$ | $\alpha(^{\circ})$ | $\beta(^{\circ})$ | $\gamma(^{\circ})$ | $P4_2/mnm(136)$ | Other Space Group Candidates |                       |                   |                  |                        |                |
|----|------------|---------------|---------------|---------------|--------------------|-------------------|--------------------|-----------------|------------------------------|-----------------------|-------------------|------------------|------------------------|----------------|
| 1  | 0.9        | 19.332        | 19.354        | 11.823        | 89.475             | 90.043            | 90.988             | $P4_2/mnm(136)$ | $Pnmm(58)$                   | $Pnm2(34)$            |                   |                  |                        |                |
| 2  | 1.1        | 19.338        | 19.437        | 11.992        | 90.406             | 89.841            | 89.375             | $P4_2/mnm(136)$ | $P4_2,2(90)(NO)$             | P-<br>$4_2m(113)(NO)$ | $P2_1,2(18)(NO)$  |                  |                        |                |
| 3  | 0.9        | 19.271        | 19.323        | 12.013        | 90.757             | 89.519            | 90.025             | $P4_2/mnm(136)$ |                              |                       |                   |                  |                        |                |
| 4  | 0.9        | 19.490        | 19.438        | 11.828        | 89.675             | 90.518            | 90.764             | $P4_2/mnm(136)$ |                              |                       |                   |                  |                        |                |
| 5  | 0.9        | 19.438        | 19.480        | 11.803        | 90.076             | 90.008            | 90.845             | $P4_2/mnm(136)$ |                              |                       |                   |                  |                        |                |
| 6  | 0.9        | 19.351        | 19.297        | 12.000        | 90.369             | 89.801            | 89.899             | $P4_2/mnm(136)$ |                              |                       |                   |                  |                        |                |
| 7  | 0.9        | 19.475        | 19.417        | 11.859        | 89.544             | 90.533            | 90.241             | $P4_2/mnm(136)$ |                              |                       |                   |                  |                        |                |
| 8  | 0.9        | 19.408        | 19.418        | 11.816        | 89.624             | 89.448            | 89.462             | $P4_2/mnm(136)$ |                              |                       |                   |                  |                        |                |
| 9  | 0.9        | 19.401        | 19.355        | 11.866        | 90.838             | 89.373            | 89.732             | $P4_2/mnm(136)$ |                              |                       |                   |                  |                        |                |
| 10 | 0.9        | 19.430        | 19.470        | 11.799        | 89.624             | 90.202            | 90.772             | $P4_2/mnm(136)$ | $Pbam(55)(NO)$               | $P4_2,2(90)(NO)$      | $P-4_2,m(113)$    | $Pba2(32)(NO)$   |                        |                |
| 11 | 1.2        | 19.174        | 19.331        | 11.937        | 89.901             | 89.993            | 90.523             | $P4_2/mnm(136)$ | $P-4_2,m(113)$               | $P4_2,2(90)(NO)$      |                   |                  |                        |                |
| 12 | 0.9        | 19.448        | 19.411        | 11.840        | 90.409             | 89.599            | 90.231             | $P4_2/mnm(136)$ |                              |                       |                   |                  |                        |                |
| 13 | 0.9        | 19.479        | 19.395        | 11.807        | 89.223             | 90.241            | 90.619             | $P4_2/mnm(136)$ |                              |                       |                   |                  |                        |                |
| 14 | 1.2        | 19.280        | 19.248        | 11.843        | 90.585             | 90.909            | 89.824             | $P4_2/mnm(136)$ |                              |                       |                   |                  |                        |                |
| 15 | 0.9        | 19.337        | 19.298        | 11.948        | 89.635             | 89.196            | 89.967             | $P4_2/mnm(136)$ | $P4mm(99)(NO)$               | P-<br>$4_2m(111)(NO)$ | $P4/mmm(123)(NO)$ | $P4_2,2(90)(NO)$ | P-<br>$4_2,m(113)(NO)$ | $P422(89)(NO)$ |
| 16 | 0.9        | 19.400        | 19.354        | 11.937        | 90.520             | 89.369            | 89.928             | $P4_2/mnm(136)$ |                              |                       |                   |                  |                        |                |
| 17 | 0.9        | 19.443        | 19.442        | 11.820        | 90.304             | 90.290            | 89.602             | $P4_2/mnm(136)$ |                              |                       |                   |                  |                        |                |
| 18 | 0.9        | 19.466        | 19.431        | 11.809        | 89.670             | 90.376            | 90.837             | $P4_2/mnm(136)$ |                              |                       |                   |                  |                        |                |
| 19 | 1.0        | 19.350        | 19.288        | 11.993        | 89.906             | 90.329            | 89.688             | $P4_2/mnm(136)$ |                              |                       |                   |                  |                        |                |
| 20 | 0.9        | 19.482        | 19.443        | 11.821        | 89.743             | 89.612            | 89.251             | $P4_2/mnm(136)$ |                              |                       |                   |                  |                        |                |
| 21 | 0.9        | 19.352        | 19.295        | 11.971        | 89.428             | 90.694            | 89.823             | $P4_2/mnm(136)$ |                              |                       |                   |                  |                        |                |
| 22 | 0.9        | 19.347        | 19.374        | 11.954        | 89.322             | 90.667            | 90.005             | $P4_2/mnm(136)$ |                              |                       |                   |                  |                        |                |
| 23 | 0.9        | 19.356        | 19.331        | 11.984        | 90.574             | 90.618            | 89.874             | $P4_2/mnm(136)$ |                              |                       |                   |                  |                        |                |
| 24 | 1.0        | 19.406        | 19.360        | 11.946        | 89.476             | 90.621            | 89.904             | $P4_2/mnm(136)$ | $P-4_2,m(113)$               | $P4_2,2(90)(NO)$      |                   |                  |                        |                |
| 25 | 0.9        | 19.365        | 19.375        | 11.965        | 90.647             | 89.345            | 90.277             | $P4_2/mnm(136)$ |                              |                       |                   |                  |                        |                |

|    |     |        |        |        |        |        |        |                           |  |  |  |  |  |  |
|----|-----|--------|--------|--------|--------|--------|--------|---------------------------|--|--|--|--|--|--|
| 26 | 1.0 | 19.412 | 19.473 | 11.883 | 89.299 | 90.612 | 90.253 | P4 <sub>2</sub> /mnm(136) |  |  |  |  |  |  |
| 27 | 0.9 | 19.363 | 19.266 | 11.999 | 90.513 | 89.117 | 90.410 | P4 <sub>2</sub> /mnm(136) |  |  |  |  |  |  |
| 28 | 0.9 | 19.325 | 19.433 | 11.888 | 89.999 | 90.734 | 90.043 | P4 <sub>2</sub> /mnm(136) |  |  |  |  |  |  |
| 29 | 0.9 | 19.456 | 19.618 | 11.905 | 90.000 | 88.615 | 90.000 | P4 <sub>2</sub> /mnm(136) |  |  |  |  |  |  |

“No” here means that structures failed to be reconstructed with this space group.

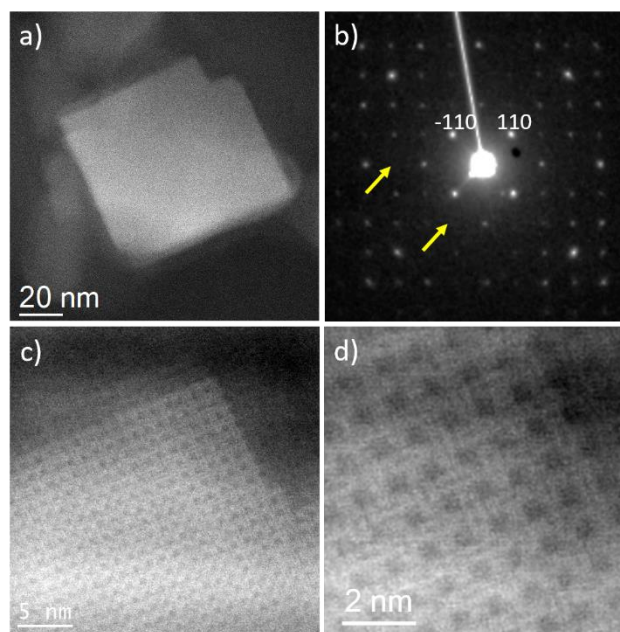

**Fig. S5** Cs-corrected STEM ADF analysis of HPM-7 along the [001] zone axis. a) Low-magnification image. b) Electron diffraction pattern that clearly displays the crystal extinctions (yellow arrows). c) and d) High-resolution images obtained from the edge of the crystal.
